# Supplementary material
Source: PubMed Central journal article supplement (PMC4861234)

## **FIGURE LEGEND**

Supplemental Figure 1: Efficacy-Toxicity Trade-off Contours for BMT CTN 0301 trial.  
Posterior desirability results for all four cyclophosphamide dose levels (150 mg/kg; 100 mg/kg; 50 mg/kg and 0 mg/kg)

Supplemental Figure 1: Efficacy-Toxicity Trade-off Contours for BMT CTN 0301 trial.

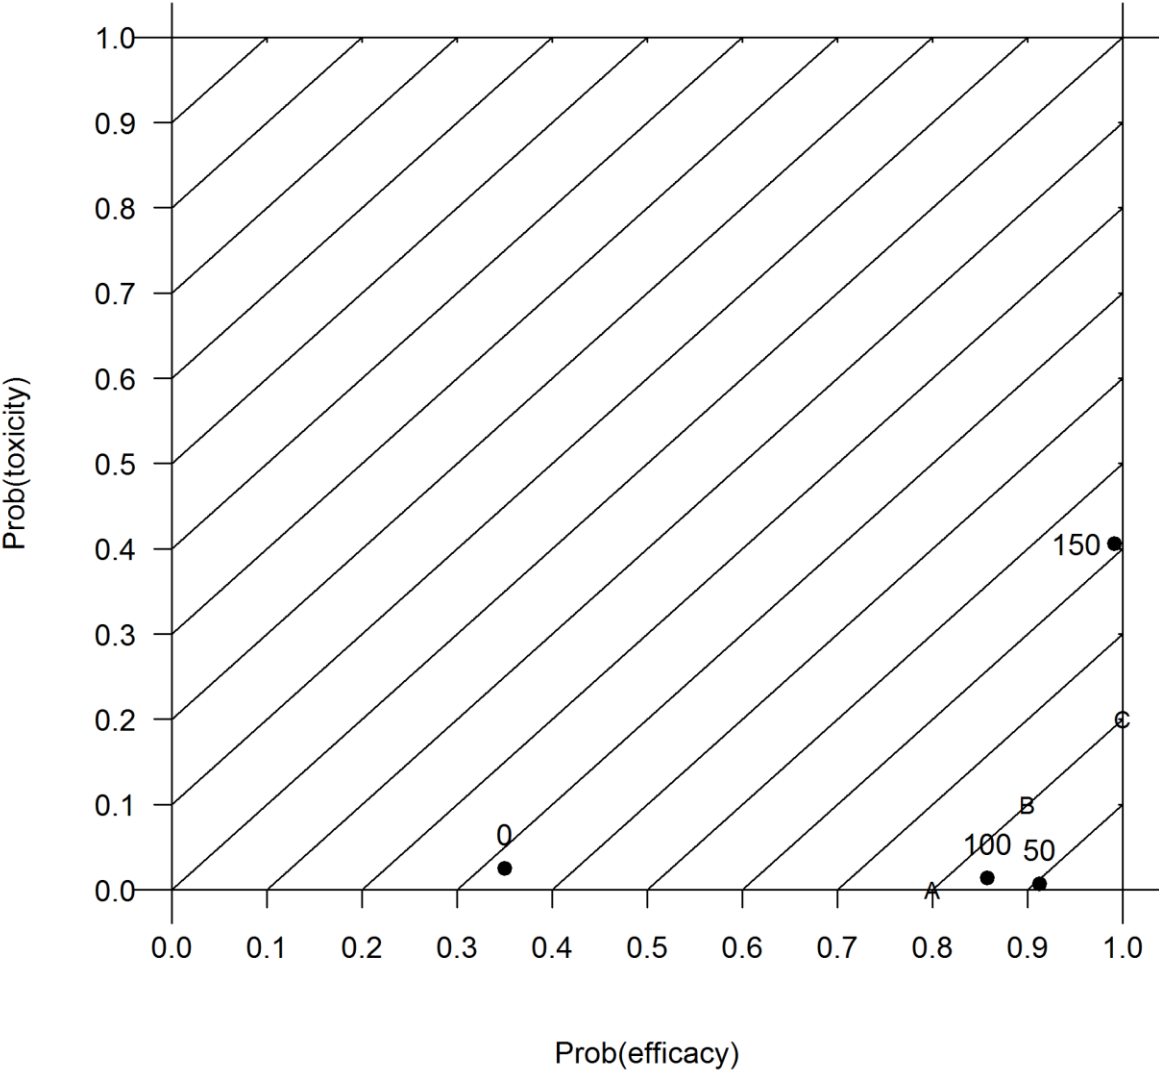

Supplement: NIHMS782524-supplement-1.pdf [file NIHMS782524-supplement-1.pdf]
